# Supplementary material for: Evaluation of Hedgehog Pathway Inhibition on Nevoid Basal Cell Carcinoma Syndrome Fibroblasts and Basal Cell Carcinoma-Associated Fibroblasts: Are Vismodegib and Sonidegib Useful to Target Cancer-Prone Fibroblasts?
Source: MDPI journal article supplement (doi:10.3390/cancers13225858), 2021-11-22
Supplement: s1 [file s1]

Table S1

Healthy donors characteristics

| Donors   | Age | Sex | Skin biopsy location |
|----------|-----|-----|----------------------|
| NHF-Ad17 | 93  | M   | Abdomen              |
| NHF-Ad19 | 60  | M   | Abdomen              |
| NHF-Br15 | 84  | F   | Arm                  |
| NHF-D16  | 36  | M   | Dorsum               |
| NHF-D24  | 40  | M   | Dorsum               |
| NHF-D27  | 39  | M   | Dorsum               |
| NHF-G9   | 63  | F   | Leg                  |
| NHF-G13  | 77  | M   | Leg                  |
| NHF-Ing5 | 96  | M   | Inguinal             |
| NHF-Pa6  | 55  | F   | Occipital area       |
| NHF-S16  | 62  | F   | Breast               |
| NHF-Sp2  | 29  | M   | Schiuder             |

Table S2

BCC patients characteristics

| Patients   | Age | Sex | Skin biopsy location |
|------------|-----|-----|----------------------|
| BCC-233    | 78  | M   | Leg                  |
| BCC-748SF  | 78  | F   | Scalp                |
| BCC-800AN  | 87  | F   | Dorsum               |
| BCC-1000NA | 67  | F   | Dorsum               |
| BCC-1PE    | 66  | M   | Abdomen              |
| BCC-2TW    | 75  | M   | Neck                 |
| BCC-4CS    | 70  | M   | Dorsum               |

Table S3

Primers for Real Time Quantitative Polymerase Chain Reaction

| Target Gene    | Foward Primer                     | Reverse primer                   |
|----------------|-----------------------------------|----------------------------------|
| <i>β-Actin</i> | 5'-GACAGGATGCAGAAGGAGATTACT-3'    | 5'-TGATCCACATCTGCTGGAAGGT-3'     |
| <i>TCF1</i>    | 5'-CCA AGA ATC CAC CAC AGG AGG-3' | 5'-GCA GCC TAG AGC ACT GTC AT-3' |
| <i>TCF4</i>    | 5'-AAG ACT GGA TGA TGC TAT TC-3'  | 5'-CTG TTG GCT GAA AGA AGG-3'    |
| <i>Lef1</i>    | 5'-TTC CTT GGT GAA CGA GTC-3'     | 5'-GGG TCC CTT GTT GTA GAG-3'    |
| <i>PDGFRα</i>  | 5'-GTG TGG GAC ATT CAT TGC GG-3'  | 5'-TAG GCT CAG CCC TGT GAG AA-3' |
| <i>PDGFRβ</i>  | 5'-GGA GAG GGC AGT AAG GAG GA-3'  | 5'-GAA GCC GCA TGG TGT CCT TG-3' |
| <i>FSP1</i>    | 5'-CTT GGT TTG GTG CTT CTG AGA-3' | 5'-TGG ACA CCA TCA CAT CCA GG-3' |

Fig. S1

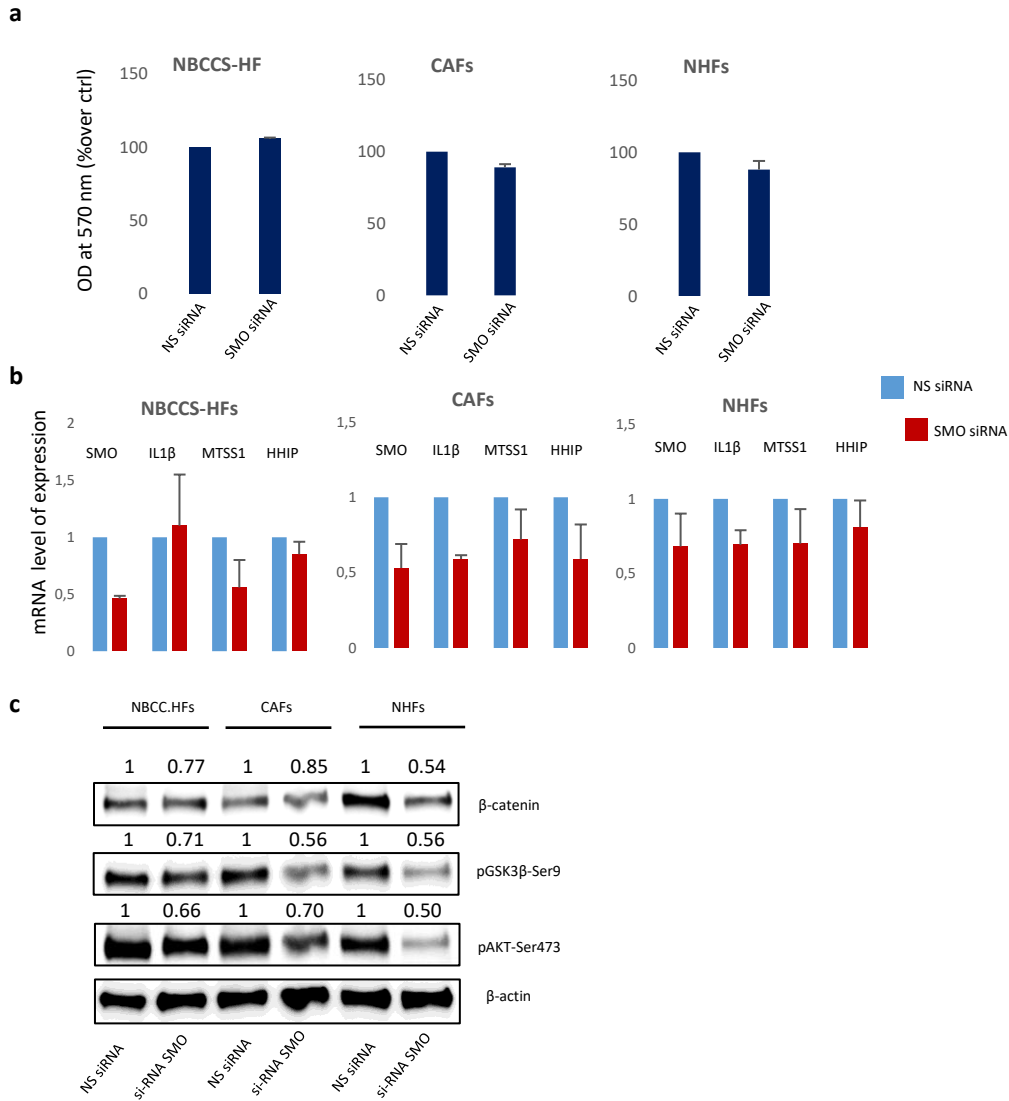

Table S4 Gene expression analysis

| Gene         | NBCCS-HF<br>NS-siRNA | NBCCS-HF<br>SMO-siRNA | CAF<br>NS-siRNA | CAF<br>SMO-siRNA | NHF<br>NS-siRNA | NHF<br>SMO-siRNA |
|--------------|----------------------|-----------------------|-----------------|------------------|-----------------|------------------|
| <i>SMO</i>   | 4.9±5.4              | 2.2±0.11              | 9.6±9.5         | 5.1±1.5          | 1.0             | 0.68±0.22        |
| <i>IL18</i>  | 6457.7±9666.3        | 7102.3±2905.3         | 30.3±23.5       | 17.9±5.0         | 1.0             | 0.69±0.10        |
| <i>MTSS1</i> | 7.5±3.4              | 4.2±1.79              | 4.73±3.4        | 3.40±0.9         | 1.0             | 0.70±0.23        |
| <i>HHIP</i>  | 873.3±1192.4         | 733.6±87.3            | 38.3±37.0       | 22.8±8.9         | 1.0             | 0.81±0.18        |

**Figure S1:** (a) MTT assay of NBCCS-HFs, CAFs and NHFs transfected with specific SMO siRNA for 72h. Data represent the average of experiments performed with 2 different SMO siRNA. (b) Semi-quantitative RT-PCR was performed to assess the level of SMO, IL1β, MTSS1 and HHIP level of expression in cells transfected with SMO siRNA (72h). Histograms report mean ± SD of 2 set of experiments performed with 2 different SMO siRNA. (c) One representative western blot detecting β-catenin, pSer9-GSK3β and pSer473-AKT after 72h treatment with siRNA (NS siRNA or SMO siRNA).

Fig. S2

a

Group : NBCCS-HFs Vis (2 week) vs NBCCS-HFs Ctrl

Reference : A    Fold Change Boundary :     P-Value Boundary :    

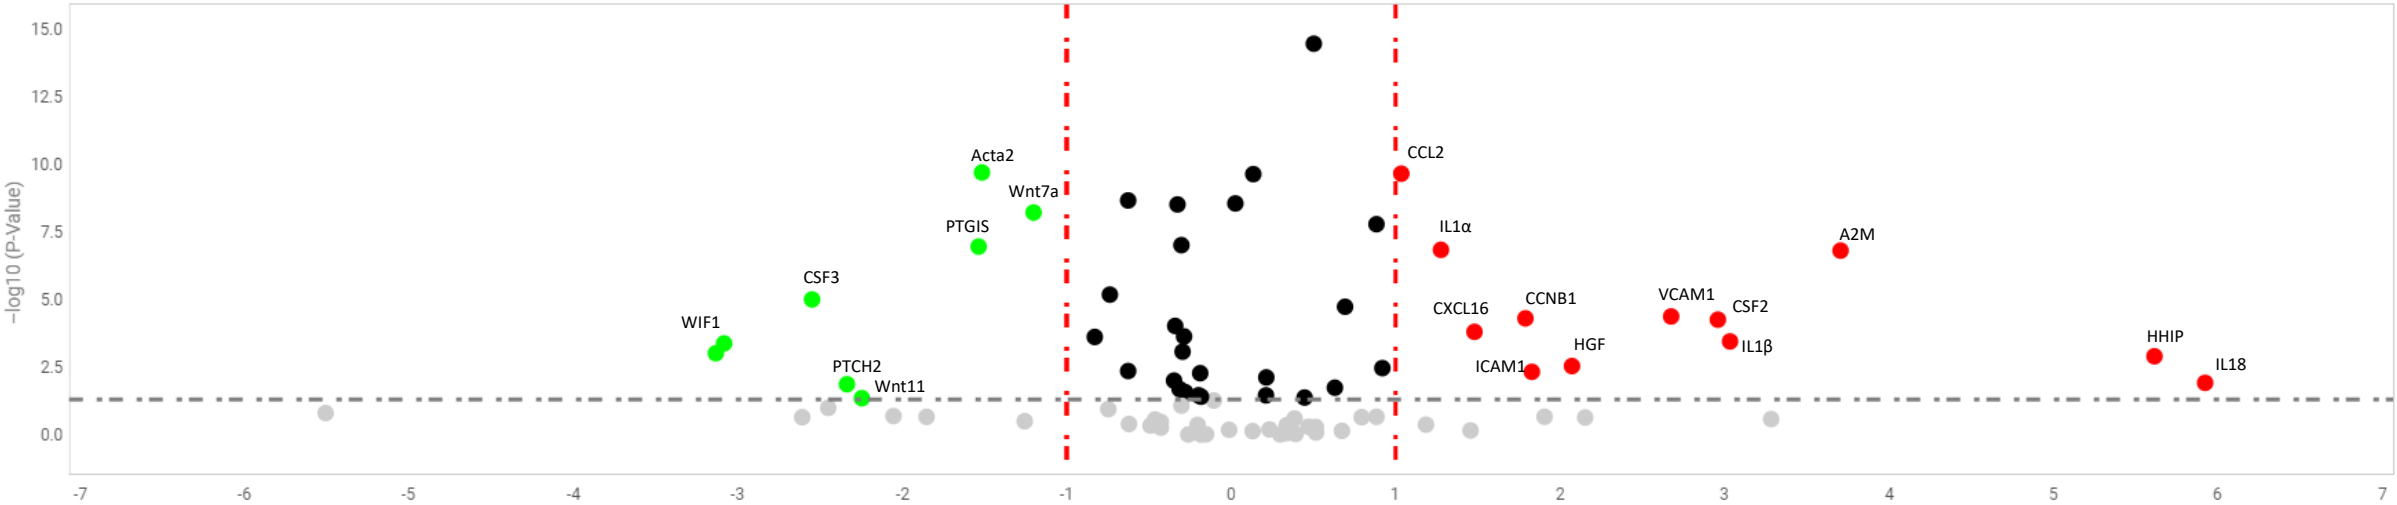

b

Group : NBCCS-HFs Son (2 week) vs NBCCS-HFs Ctrl

Reference : A    Fold Change Boundary :     P-Value Boundary :    

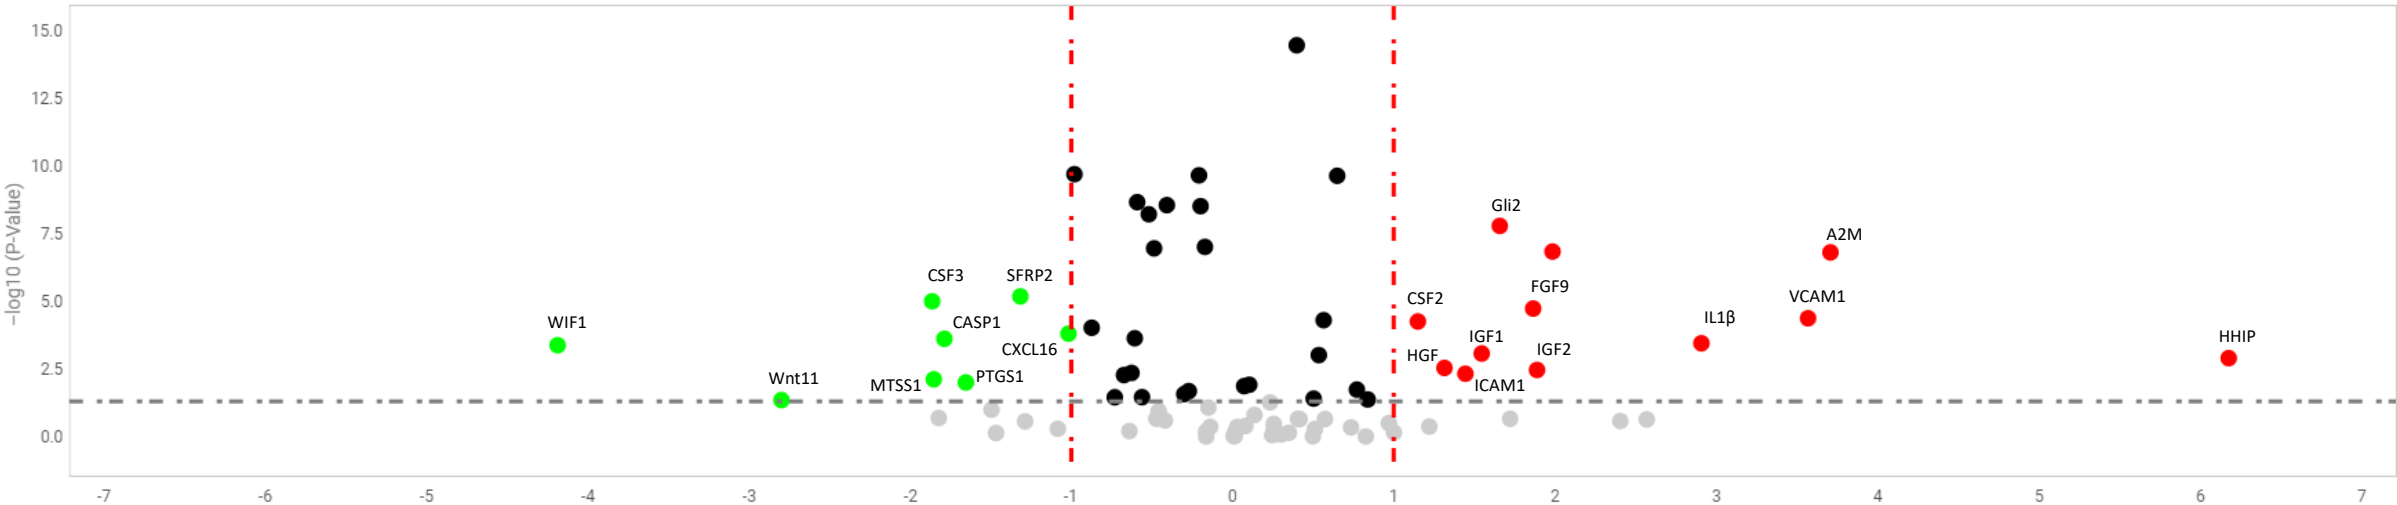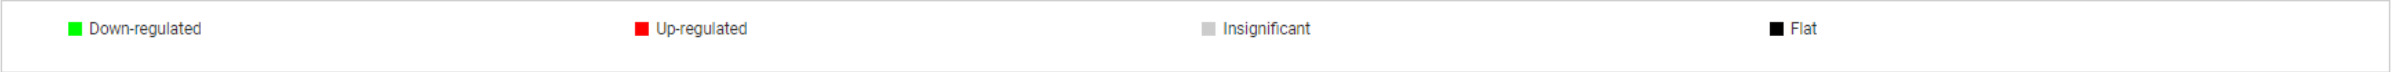

**Figure S2:** Volcano plot represents gene expression analysis comparing NBCCS-HFs treated with vismodegib (a) and sonidegib (b) for 2 weeks (n=9). (b) Analysis was performed using three different housekeeping genes ( $\beta$ -actin, GAPDH and 18S). One-way ANOVA statistical test with thresholds  $>2.0$  fold-change and  $p < 0.05$  defined significant increase are reported in red; significant decrease  $<0.5$  fold-change and  $p < 0.05$  reported in green; any fold-difference with  $p \geq 0.5$ , *e.g.* insignificant are reported in grey;  $\leq 2.0$  or  $\geq 0.5$  difference *e.g.* flat reported in black.
